# Supplementary material for: Nuclear factor erythroid 2-related factors 1 and 2 are able to define the worst prognosis group among high-risk diffuse large B cell lymphomas treated with R-CHOEP
Source: PubMed Central journal article supplement — J Clin Pathol. 2019 Feb 12;72(4):316–21. doi: 10.1136/jclinpath-2018-205584 (PMC6580789; doi:10.1136/jclinpath-2018-205584), 2019-02-12
Supplement: jclinpath-2018-205584supp001.pdf [file jclinpath-2018-205584supp001.pdf]

## Appendix

**Table 1** Antibodies and immunostaining methods

| Antibody                                                  | Microwave buffer               | Concentration | Incubation              |
|-----------------------------------------------------------|--------------------------------|---------------|-------------------------|
| Nrf1 (HPA065424),<br>Sigma Aldrich,<br>Darmstadt, Germany | Tris-EDTA buffer, pH 9         | 1:500         | overnight at +4°C       |
| Nrf2 (ab76026), Abcam<br>plc., Cambridge, UK              | sodium citrate buffer, pH<br>6 | 1:500         | 1 h at room temperature |
| KEAP1 (NBP2-37431),<br>Novus Biologicals,<br>Oxford, UK   | sodium citrate buffer, pH<br>6 | 1:100         | overnight at +4°C       |
| BACH1 (NBP2-01904),<br>Novus Biologicals,<br>Oxford, UK   | Tris-EDTA buffer, pH 9         | 1:100         | 1 h at room temperature |

**Table 2** Patient demographics at the time of diagnosis.

|                        | n  | %  |
|------------------------|----|----|
| Sex                    |    |    |
| Male                   | 51 | 67 |
| Female                 | 25 | 33 |
| Diagnosis              |    |    |
| GC DLBCL               | 24 | 32 |
| non-GC DLBCL           | 32 | 42 |
| T-cell rich BCL        | 19 | 25 |
| NOS/unspecified        | 1  | 1  |
| B-symptoms             |    |    |
| None                   | 27 | 35 |
| Yes                    | 44 | 58 |
| Missing                | 5  | 7  |
| Age                    |    |    |
| ≤ 60                   | 68 | 89 |
| > 60                   | 8  | 11 |
| LD levels              |    |    |
| Normal                 | 9  | 12 |
| Elevated               | 63 | 83 |
| Missing                | 4  | 5  |
| Stage                  |    |    |
| I-II                   | 11 | 15 |
| III-IV                 | 64 | 84 |
| Missing                | 1  | 1  |
| WHO performance status |    |    |
| 0-1                    | 39 | 51 |
| > 1                    | 33 | 44 |
| Missing                | 4  | 5  |
| Extranodal affision    |    |    |
| 0-1                    | 35 | 46 |
| >1                     | 37 | 49 |
| Missing                | 4  | 5  |
| IPI                    |    |    |

|                                         |    |    |
|-----------------------------------------|----|----|
| 0-2                                     | 27 | 35 |
| 3-5                                     | 47 | 62 |
| Missing                                 | 2  | 3  |
| Hb                                      |    |    |
| < 117 g/L / < 134 g/L (women / men)     | 28 | 37 |
| 117-155 g/L / 134-167 g/L (women / men) | 13 | 17 |
| Missing                                 | 41 | 46 |
| Leukocytes                              |    |    |
| < 3.4 x E9/L                            | 8  | 10 |
| 3.4-8.2 x E9/L                          | 24 | 32 |
| > 8.2 x E9/L                            | 9  | 12 |
| Missing                                 | 35 | 46 |
| Neutrophils                             |    |    |
| < 1.5 x E9/L                            | 7  | 9  |
| 1.5-6.7 x E9/L                          | 22 | 30 |
| > 6.7 x E9/L                            | 8  | 10 |
| Missing                                 | 39 | 51 |
| Lymphocytes                             |    |    |
| < 1.3 x E9/L                            | 13 | 17 |
| 1.3-3.6 x E9/L                          | 28 | 21 |
| Missing                                 | 41 | 62 |
| Febrile neutropenia after I cycle       |    |    |
| Yes                                     | 10 | 13 |
| No                                      | 66 | 87 |

**Table 3** Statistically significant associations between immunohistochemistry and disease presentation. *P*-values represent Mann-Whitney U test.

|                             | Positive association                                                     | Negative association                                    |
|-----------------------------|--------------------------------------------------------------------------|---------------------------------------------------------|
| Cytoplasmic Nrf1 expression |                                                                          | B-symptoms, <i>P</i> = 0.037                            |
| Cytoplasmic Nrf2 expression | Haemoglobin, <i>P</i> = 0.028                                            | B-symptoms, <i>P</i> = 0.046<br>Stage, <i>P</i> = 0.027 |
| Nuclear Nrf1 expression     | I cycle neutropenic infection, <i>P</i> = 0.028                          |                                                         |
| Nuclear Nrf2 expression     | IPI, <i>P</i> = 0.008<br>I cycle neutropenic infection, <i>P</i> = 0.004 | Hb, <i>P</i> = 0.022                                    |
| Nuclear Bach1 expression    | Stage, <i>P</i> = 0.014                                                  |                                                         |
